# Supplementary material
Source: MDPI journal article supplement (https://www.mdpi.com/2071-1050/15/4/3842)
Supplement: s1 [file s1]

# Supplementary Material – Survey questionnaire

---

## Page 1: Consent Survey

The purpose of this research is to understand public perception of Brownfield regeneration through urban rewilding for resilience. This is a research project being [.....]Please select your choice below.

Clicking on the "agree" button below indicates that:

- you have read the above information
- you voluntarily agree to participate
- you are at least 18 years of age

If you do not wish to participate in the research study, please decline participation by clicking on the "disagree" button.

- ☐ Agree
- ☐ Disagree

Thank you

## Page 2: Page 1

### Your age:

- ☒ 18-20
- ☐ 21-30
- ☐ 31-50
- ☐ 50-65
- ☐ Above 65

### Your gender:

### Your ethnic group:

- ☐ White
- ☐ Mixed/Multiple ethnic groups
- ☐ Asian/Asian British
- ☐ Black/ African/Caribbean/Black British
- ☐ Other

### Your education:

- ☐ Level 3/4 (A Level/GNVQ/B Tech)
- ☐ Level 5 (HND)
- ☐ Level 6 (BA/BSc)
- ☐ Level 7 (MA/MSc/Diploma)
- ☐ Level 8 (Doctorate or PhD)
- ☐ Professional Registration

### Work:

- ☐ Employed (Full Time)

- ☐ Employed (Part Time)
- ☐ Homemaker
- ☐ Student
- ☐ Retired
- ☐ Not Working
- ☐ Self Employed

**Where do you live (and mainly work from)?**

- ☐ Southeast England
- ☐ Southwest England
- ☐ Midlands
- ☐ Northeast England
- ☐ East of England
- ☐ Northwest England
- ☐ Yorkshire and Humber
- ☐ Wales
- ☐ Northern Ireland
- ☐ Scotland
- ☐ European Union
- ☐ Other

**Do you have access to green space (garden, parks, and open areas)?**

**Do you feel need for more green spaces or nature in urban areas?**

- ☐ Yes
- ☐ No
- ☐ Not sure

**In your opinion, how important is biodiversity in urban areas?**

Please select exactly 1 answer(s).

- ☐ Not important
- ☐ Slightly Important
- ☐ Moderately Important
- ☐ Very Important
- ☐ Extremely Important

**Have you heard about urban regeneration of brownfield land?** *Brownfields are developed lands, which are partially or completely abandoned, unused or unoccupied, with traces of construction and industry*

**Would rewilding of brownfield sites/ abandoned land in Urban areas be useful to the community?** *Urban rewilding, as a term, includes those initiatives or programs that seek to encourage biodiversity, ecosystem function, and the persistence of native species in a range of urban settings, including on private and public land.*  
(Source:WLA)

[More info](#)

**In order of your preference (where 1 is most important and 8 is least important), what type of land-use should be considered for brownfield regeneration in urban areas?**

Please don't select more than 1 answer(s) per row.

Please don't select more than 1 answer(s) in any single column.

|   | Area for parks           | Area for food production | Area for housing         | Areas to enhance biodiversity | Areas for retail and leisure | Areas to generate employment opportunities | Urban woodlands, areas for ecosystem services for community and wildlife | Others                   |
|---|--------------------------|--------------------------|--------------------------|-------------------------------|------------------------------|--------------------------------------------|--------------------------------------------------------------------------|--------------------------|
| 1 | <input type="checkbox"/> | <input type="checkbox"/> | <input type="checkbox"/> | <input type="checkbox"/>      | <input type="checkbox"/>     | <input type="checkbox"/>                   | <input type="checkbox"/>                                                 | <input type="checkbox"/> |
| 2 | <input type="checkbox"/> | <input type="checkbox"/> | <input type="checkbox"/> | <input type="checkbox"/>      | <input type="checkbox"/>     | <input type="checkbox"/>                   | <input type="checkbox"/>                                                 | <input type="checkbox"/> |
| 3 | <input type="checkbox"/> | <input type="checkbox"/> | <input type="checkbox"/> | <input type="checkbox"/>      | <input type="checkbox"/>     | <input type="checkbox"/>                   | <input type="checkbox"/>                                                 | <input type="checkbox"/> |
| 4 | <input type="checkbox"/> | <input type="checkbox"/> | <input type="checkbox"/> | <input type="checkbox"/>      | <input type="checkbox"/>     | <input type="checkbox"/>                   | <input type="checkbox"/>                                                 | <input type="checkbox"/> |
| 5 | <input type="checkbox"/> | <input type="checkbox"/> | <input type="checkbox"/> | <input type="checkbox"/>      | <input type="checkbox"/>     | <input type="checkbox"/>                   | <input type="checkbox"/>                                                 | <input type="checkbox"/> |

|   |                          |                          |                          |                          |                          |                          |                          |                          |
|---|--------------------------|--------------------------|--------------------------|--------------------------|--------------------------|--------------------------|--------------------------|--------------------------|
| 6 | <input type="checkbox"/> |
| 7 | <input type="checkbox"/> |
| 8 | <input type="checkbox"/> |

On a scale 1 to 8, please rank (where 1 is most important and 8 is least important) as options for brownfield regeneration in urban areas.

Please don't select more than 1 answer(s) per row.

Please don't select more than 1 answer(s) in any single column.

|   | Urban Agriculture        | Urban woodland and wetlands | Gardens                  | Sports/Leisure facilities | Venues for Cultural / Public events | Low Intervention Parks   | Nature Experience Areas (see wildlife/birds) | Urban Wilderness         |
|---|--------------------------|-----------------------------|--------------------------|---------------------------|-------------------------------------|--------------------------|----------------------------------------------|--------------------------|
| 1 | <input type="checkbox"/> | <input type="checkbox"/>    | <input type="checkbox"/> | <input type="checkbox"/>  | <input type="checkbox"/>            | <input type="checkbox"/> | <input type="checkbox"/>                     | <input type="checkbox"/> |
| 2 | <input type="checkbox"/> | <input type="checkbox"/>    | <input type="checkbox"/> | <input type="checkbox"/>  | <input type="checkbox"/>            | <input type="checkbox"/> | <input type="checkbox"/>                     | <input type="checkbox"/> |
| 3 | <input type="checkbox"/> | <input type="checkbox"/>    | <input type="checkbox"/> | <input type="checkbox"/>  | <input type="checkbox"/>            | <input type="checkbox"/> | <input type="checkbox"/>                     | <input type="checkbox"/> |
| 4 | <input type="checkbox"/> | <input type="checkbox"/>    | <input type="checkbox"/> | <input type="checkbox"/>  | <input type="checkbox"/>            | <input type="checkbox"/> | <input type="checkbox"/>                     | <input type="checkbox"/> |
| 5 | <input type="checkbox"/> | <input type="checkbox"/>    | <input type="checkbox"/> | <input type="checkbox"/>  | <input type="checkbox"/>            | <input type="checkbox"/> | <input type="checkbox"/>                     | <input type="checkbox"/> |
| 6 | <input type="checkbox"/> | <input type="checkbox"/>    | <input type="checkbox"/> | <input type="checkbox"/>  | <input type="checkbox"/>            | <input type="checkbox"/> | <input type="checkbox"/>                     | <input type="checkbox"/> |
| 7 | <input type="checkbox"/> | <input type="checkbox"/>    | <input type="checkbox"/> | <input type="checkbox"/>  | <input type="checkbox"/>            | <input type="checkbox"/> | <input type="checkbox"/>                     | <input type="checkbox"/> |
| 8 | <input type="checkbox"/> | <input type="checkbox"/>    | <input type="checkbox"/> | <input type="checkbox"/>  | <input type="checkbox"/>            | <input type="checkbox"/> | <input type="checkbox"/>                     | <input type="checkbox"/> |

**What factors should drive/ be considered for brownfield regeneration in urban areas?**

**How well should ecological regeneration principles be identified in Brownfield Regeneration**

- ☐ Extremely well
- ☐ Very well
- ☐ Moderately well
- ☐ Slightly Well
- ☐ No well at all

**Should Urban Green spaces approach high levels of ecological and environmental quality**

- ☐ Yes
- ☐ No
- ☐ Don't know

**Would rewilding of brownfield sites/ abandoned land in Urban areas be useful to the community?**

## Page 3: Photo-elicitation Survey

The example below shows a transformation of a brownfield site. Do you think the transformation is good for biodiversity?

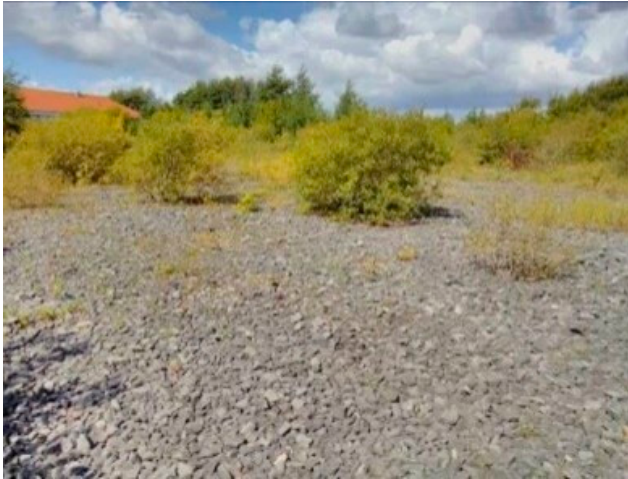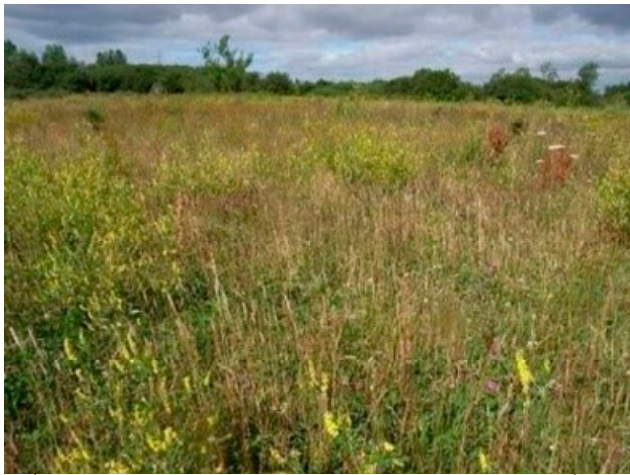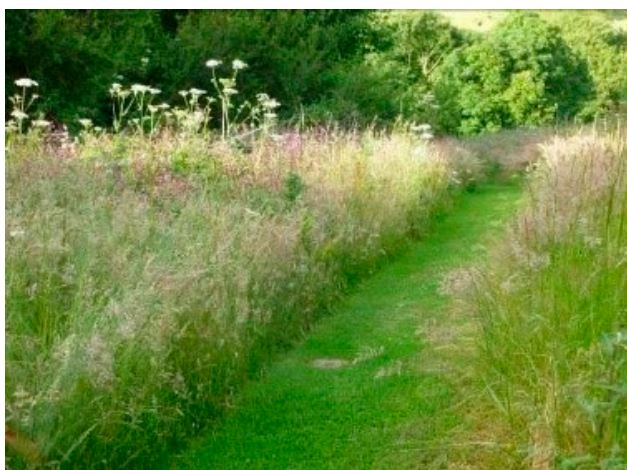

- ☐ Yes
- ☐ No
- ☐ Don't know

The example below shows a transformation of a brownfield site. Which scenario provides more benefits?



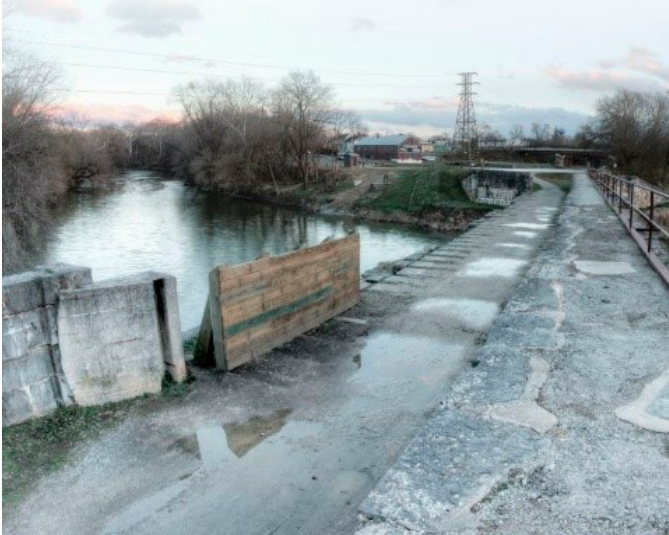

01 - No wildness

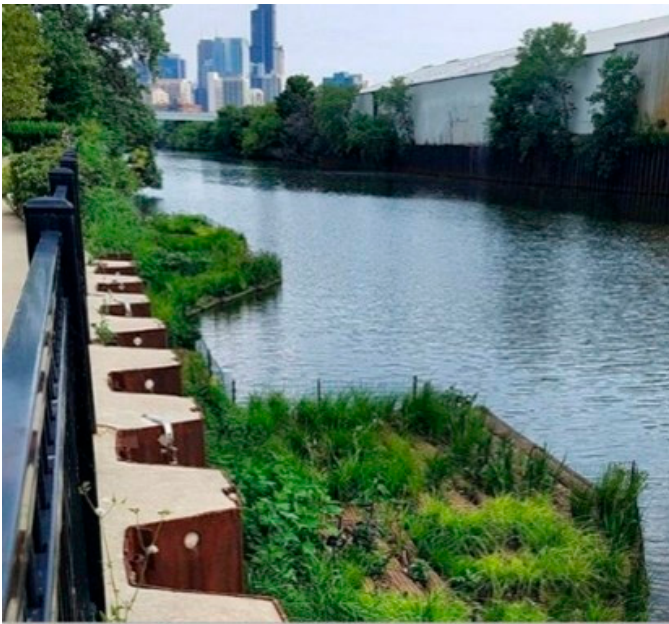

02 - Low wildness

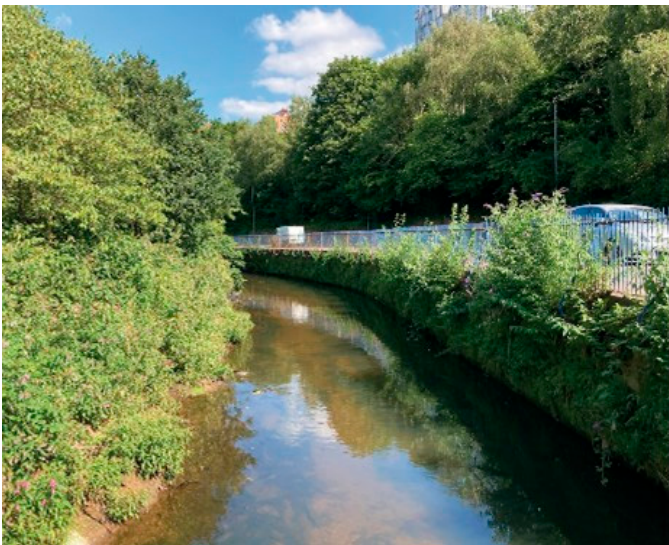

03 - Medium wildness

Please don't select more than 1 answer(s) per row.



|                                        | 01 - No wildness         | 02 - Low wildness        | 03 - Medium wildness     |
|----------------------------------------|--------------------------|--------------------------|--------------------------|
| Which scenario provides more benefits? | <input type="checkbox"/> | <input type="checkbox"/> | <input type="checkbox"/> |

Consider the below transformation of a brownfield site. Do you think it provides environmental benefit?

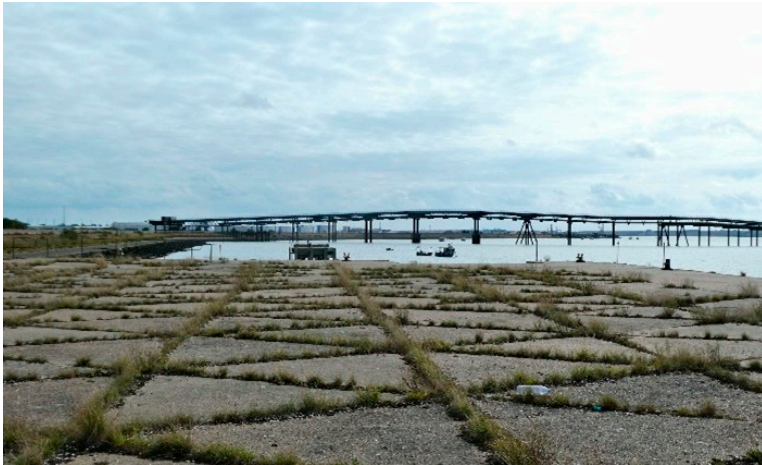

*Before*

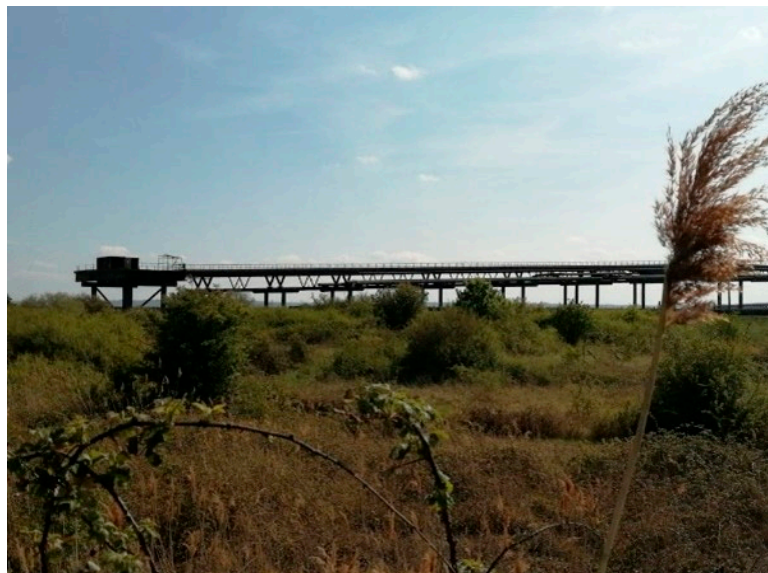

*After*

- ☐ Yes
- ☐ No
- ☐ Don't know

Do you think the below transformation provides improved access to green spaces for the community and provides social benefit?

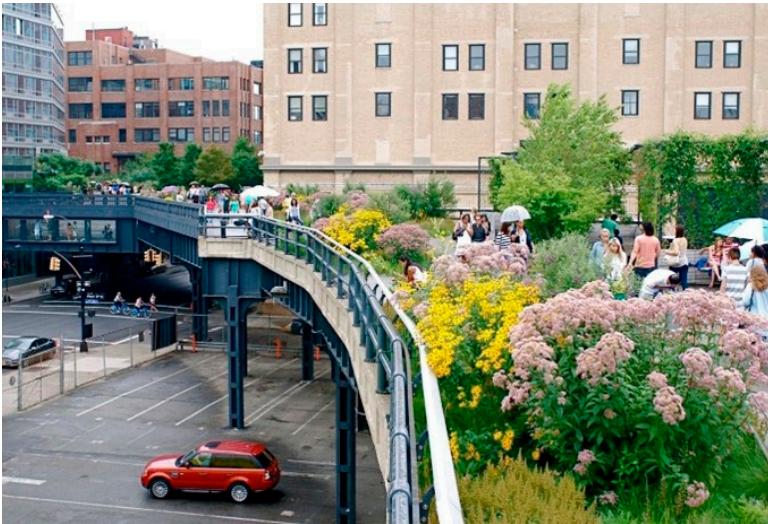

- ☐ Yes
- ☐ No
- ☐ Don't know

**Do you think the below transformation to urban wetlands offers economic benefits for the community?**

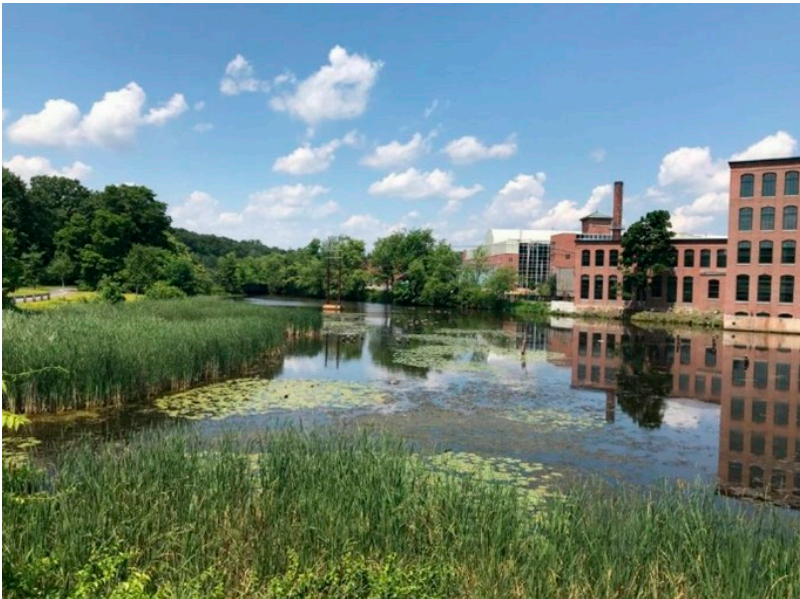

- ☐ Yes
- ☐ No
- ☐ Don't know

Would rewilding of the site below improve the quality of life and access to green space for the community?

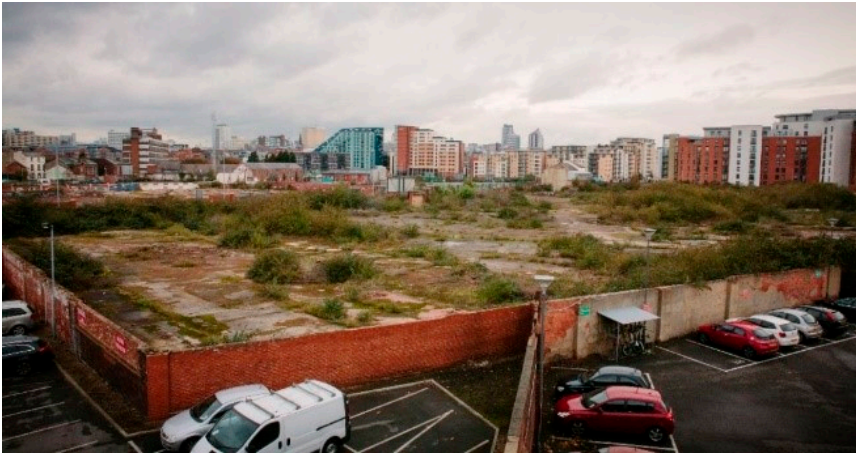

- ☐ Yes
- ☐ No
- ☐ Don't know

Would rewilding of the site below lead to upliftment of socio-economic fabric of the area?

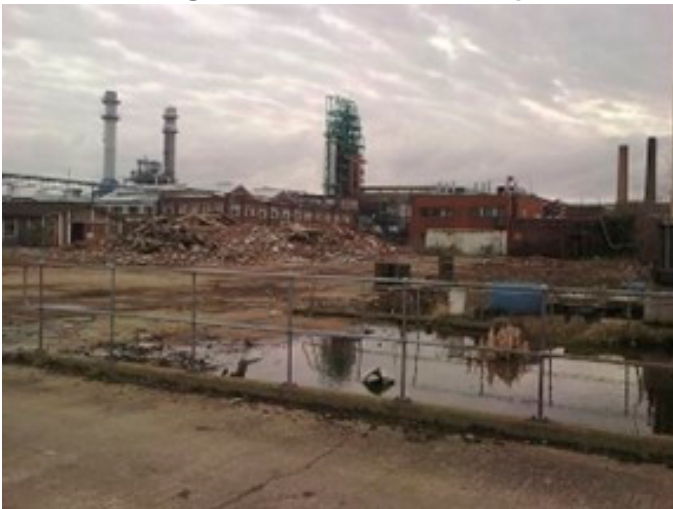

- ☐ Yes
- ☐ No
- ☐ Don't know

Would rewilding of the site below uplift the land value of the area?



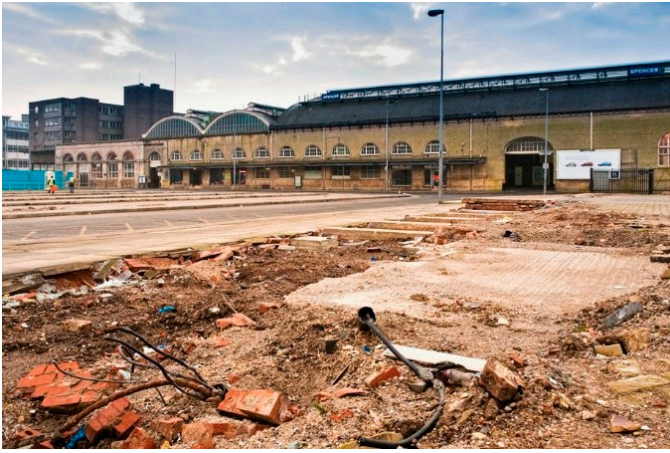

- ☐ Yes
- ☐ No
- ☐ Don't know

**Would rewilding of the site below promote healthy living and benefit public health?**

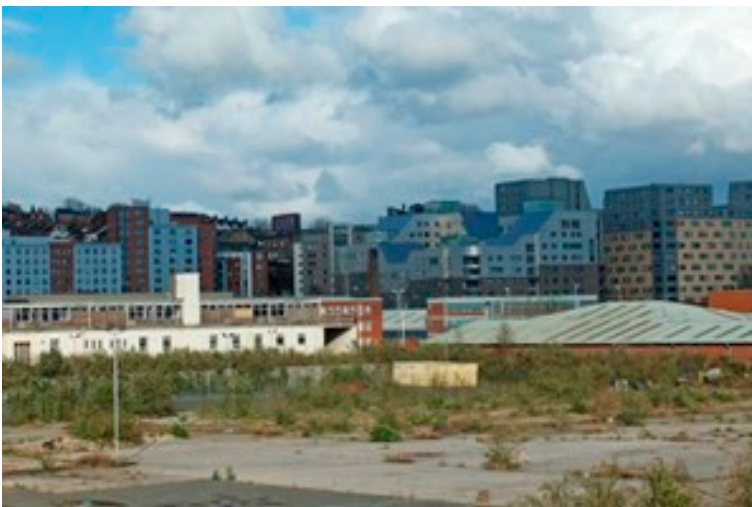

- ☐ Yes
- ☐ No
- ☐ Don't know

## Page 4: Final page

Thank you for your participation.

### Image references

<https://www.publicsectorexecutive.com/articles/local-regeneration-boosted-land-transformation>

Copyright Cognitive Publishing Ltd 2020

<https://www.planningresource.co.uk/article/1730041/government-announces-58m-brownfield-land-funding-help-deliver-5600-new-homes>

Copyright pinterest 2022

1814855\_Brownfield-site\_Cambridge\_Flickr\_Credit-EngineeringatCambridge

Credit: Shutterstock

Copyright: Copyright (c) 2019 philip openshaw/Shutterstock

<https://www.publicsectorexecutive.com/articles/levelling-up-brownfield-funding-transformation-regeneration>

<https://www.publicsectorexecutive.com/articles/levelling-up-brownfield-funding-transformation-regeneration>
